# Supplementary material
Source: PubMed Central journal article supplement (PMC7897265)
Supplement: NIHMS1646766-supplement-1.pdf [file NIHMS1646766-supplement-1.pdf]

## Supplemental Figures:

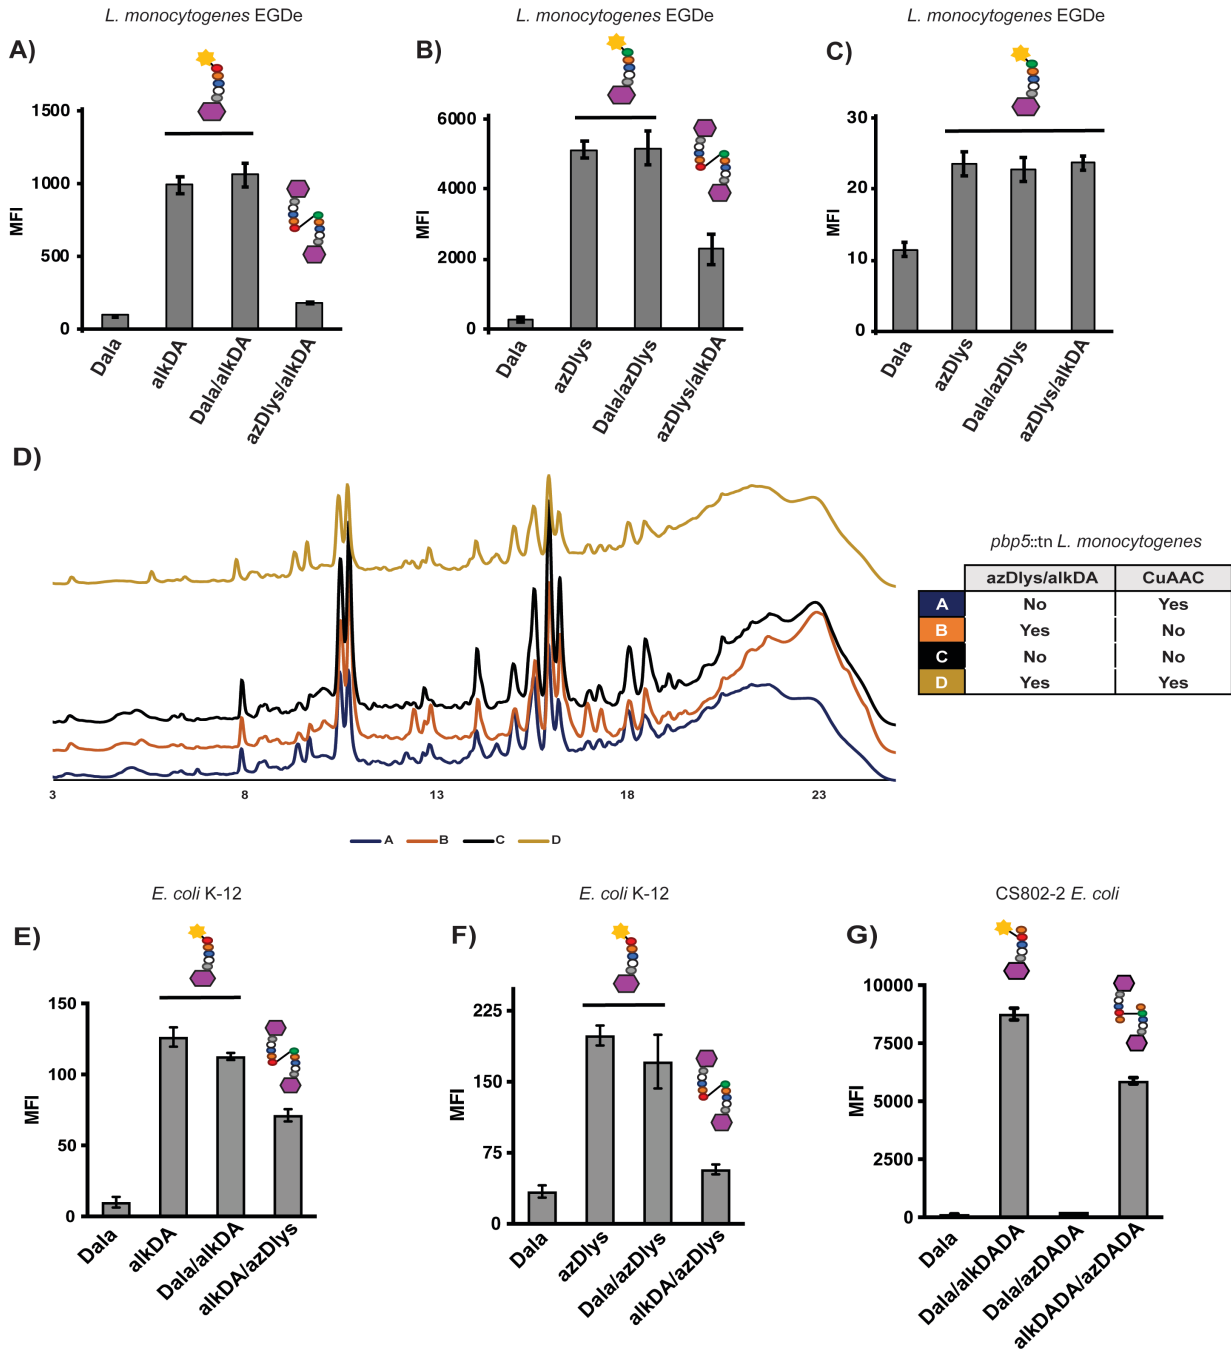

**Figure S1. Indirect evidence for synthetic cross-links in *Listeria monocytogenes* and *Escherichia coli*, related to Figures 1 and 2.** (A-C) and (E-F) loss of fluorescence from mono-peptide D-amino acid labeling followed by CuAAC. Wild-type *L. monocytogenes* EGDe (A-C) and *E. coli* K-12 (E-F) were incubated in the presence of the indicated D-amino acids, washed, and subjected to CuAAC with either azido- (A, E) or alkynyl-fluorophore (B, F) or to SPAAC with DBCO-CR110 (C). (D) *L. monocytogenes* peptidoglycan analysis. The *pbp5::tn* mutant was incubated or not with

a mixture of alkyne-D-alanine (alkDA) and azido-D-lysine (azDlys), washed, and subjected to CuAAC with BTTP ligand. Peptidoglycan was extracted, digested with mutanolysin and lysozyme, and separated by ultra-performance liquid chromatography (UPLC). We were unable to detect differences between the chromatograms that were specific to both alkDA/azDlys and CuAAC treatments, presumably because of the pre-existing complexity of the Gram-positive peptidoglycan. Experiment was performed twice. (G) Loss of fluorescence from dipeptide D-amino acid labeling followed by CuAAC. CS802-2 *E. coli* were incubated in the presence of N-terminally-modified D-amino acid dipeptides azido-D-alanine-D-alanine (azDADA) or alkynyl- D-alanine-D-alanine (alkDADA), washed, and subjected to CuAAC with BTTP ligand and picolyl azide AF488. For (A-C) and (E-G), fluorescence was quantitated by flow cytometry and data are representative of 2-6 biological replicates performed in technical triplicate. MFI, mean fluorescence intensity. Error bars, +/- standard deviation of technical replicates.

A)

| Ion          | Fragment lost                                      | [H+M] <sup>+</sup> |            |
|--------------|----------------------------------------------------|--------------------|------------|
|              |                                                    | Observed           | Calculated |
| Parental Ion | -                                                  | 2090.878           | 2090.898   |
| 1            | GlcNAc                                             | 1887.817           | 1887.811   |
| 2            | GlcNAc, GlcNAc                                     | 1684.633           | 1684.724   |
| 3            | GlcNAc, GlcNAc, MurNAc                             | 1407.681           | 1407.608   |
| 4            | GlcNAc, GlcNAc, MurNAc, MurNAc, Ala                | 1059.423           | 1059.455   |
| 5            | GlcNAc, GlcNAc, MurNAc, MurNAc, Ala, Glu           | 930.38             | 930.412    |
| 6            | GlcNAc, GlcNAc, MurNAc, MurNAc, Ala, Glu, DAP, Ala | 687.279            | 687.29     |

B)

|                   | alkDa          | azDA          |                |
|-------------------|----------------|---------------|----------------|
|                   | Dala/alkDA     | Dala/azDA     | Dala/azDA      |
|                   | -CuAAC         | -CuAAC        | +CuAAC         |
| % PG-Modification | 6.205 ± 0.81   | 10.615 ± 0.01 | 11.695 ± 1.08  |
| % Cross-linkage   | 53.8575 ± 1.15 | 46.84 ± 7.707 | 48.5175 ± 5.53 |

C)

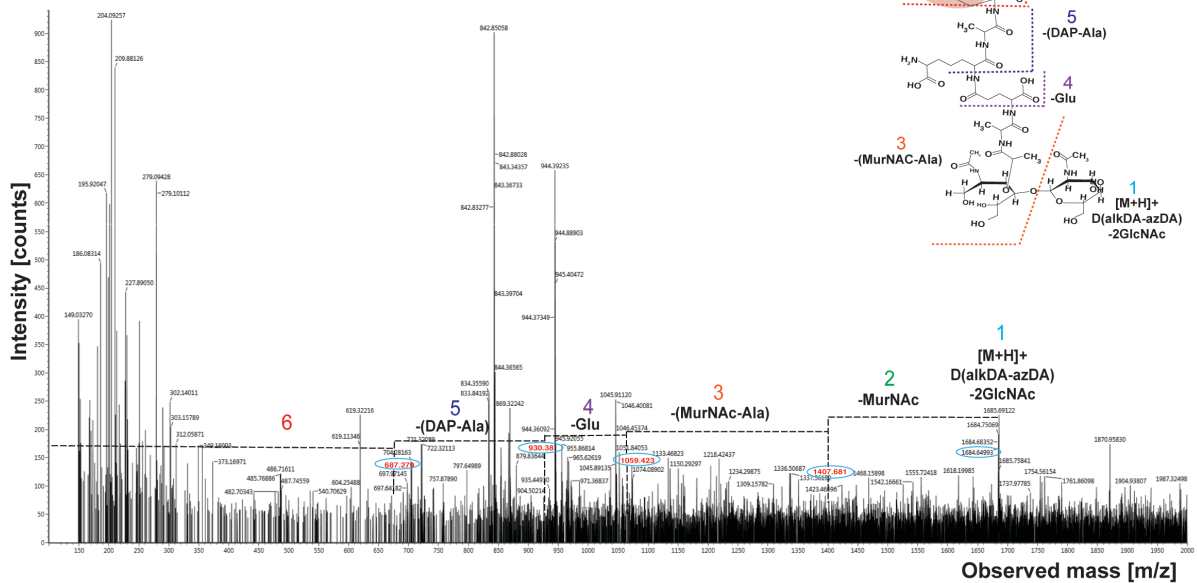

D)

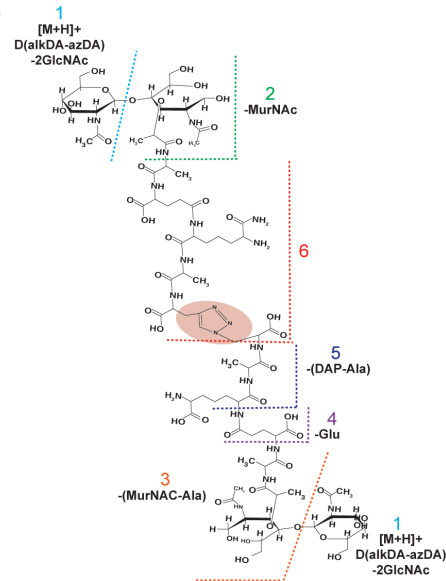

**Figure S2. Biochemical characterization of synthetic cross-links in *E. coli*, related to Figure 2. (A) MS/MS fragmentation of 5-5 triazole dimer. (B) Quantification of muuropeptides from CS802-2 *E. coli* treated with Dala/alkDA or Dala/azDA and subjected or not to CuAAC. (C-D) Chemical structure and MS/MS profile of 5-5 triazole dimer. Data are from two biological replicates.**

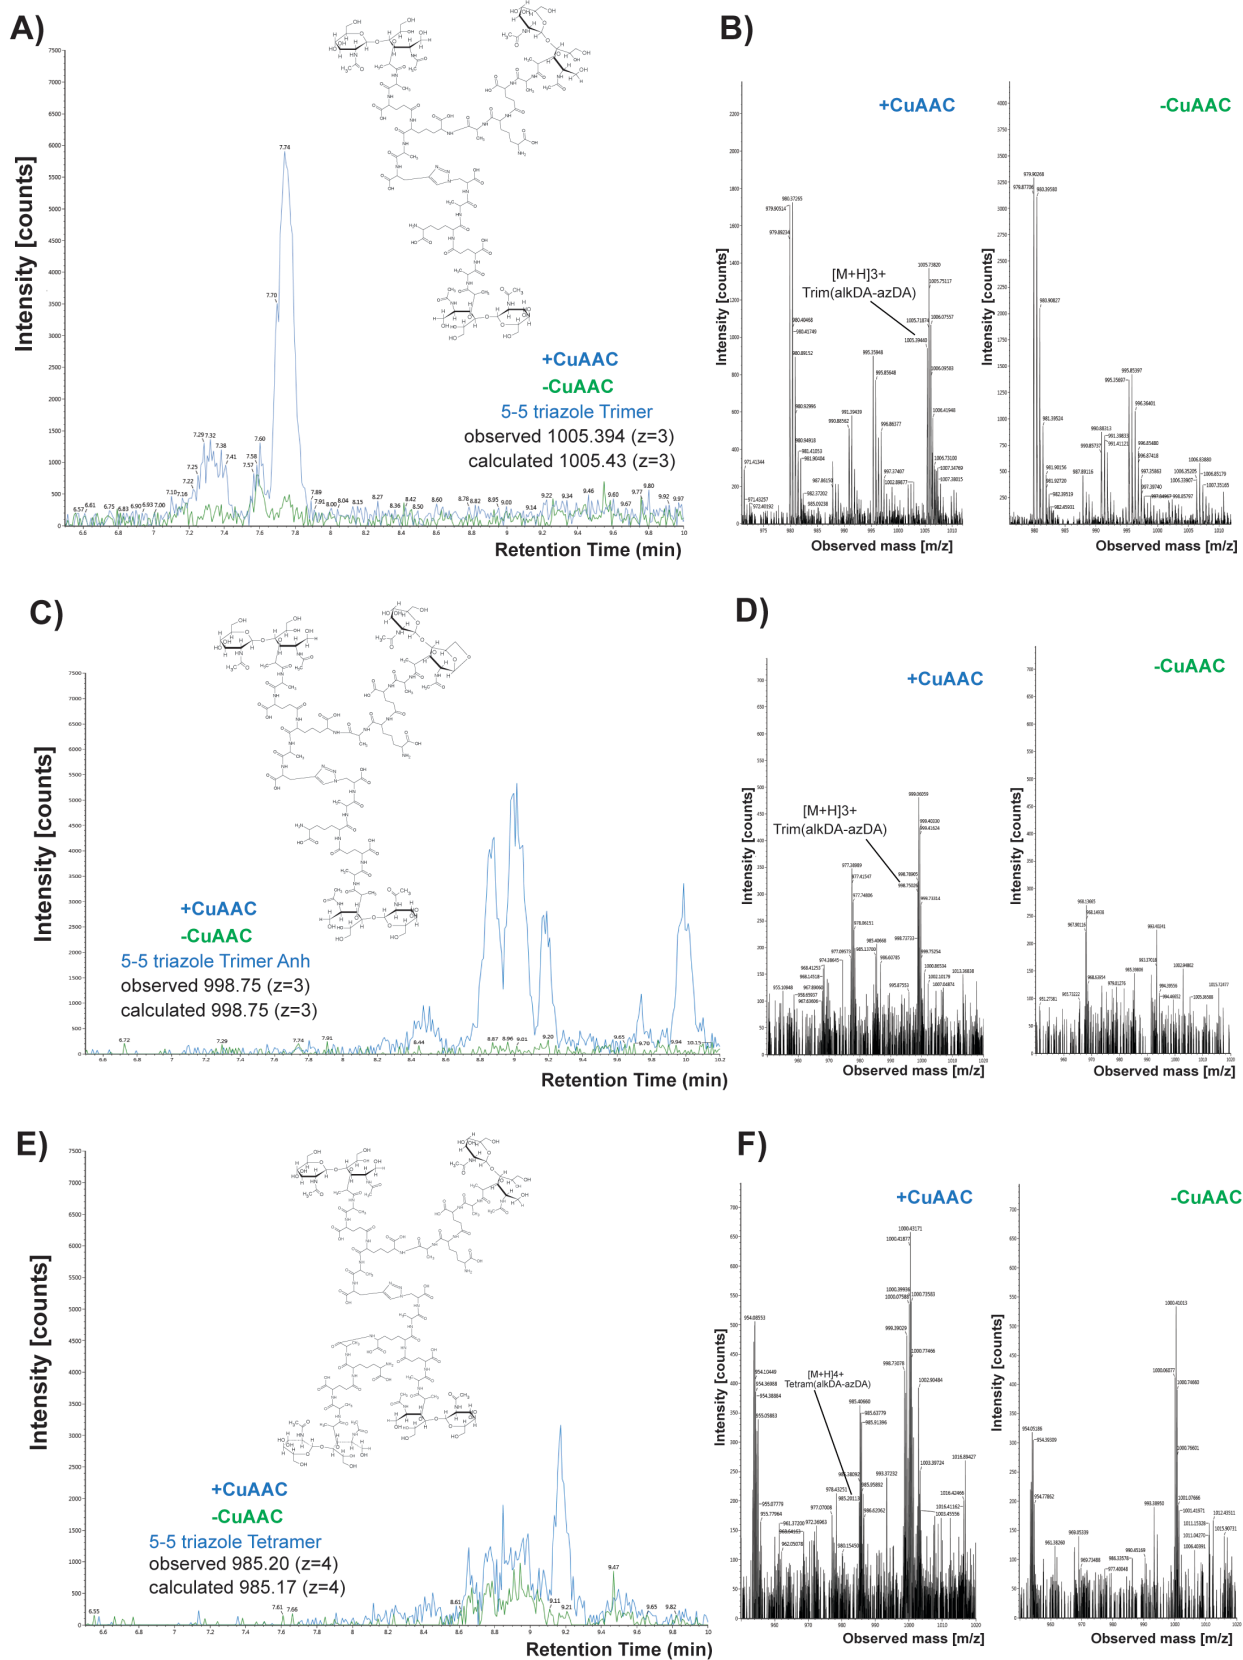

Figure S3. Ion detection and MS profiles of 5-5 triazole-linked trimers, related to

**Figure 2.** Ion detection (left) and MS profiles (right) for 5-5 triazole-linked trimer (A,B), trimer anh (C,D), and tetramer (E,F) from alkDA/azDA-labeled bacteria +/- CuAAC.

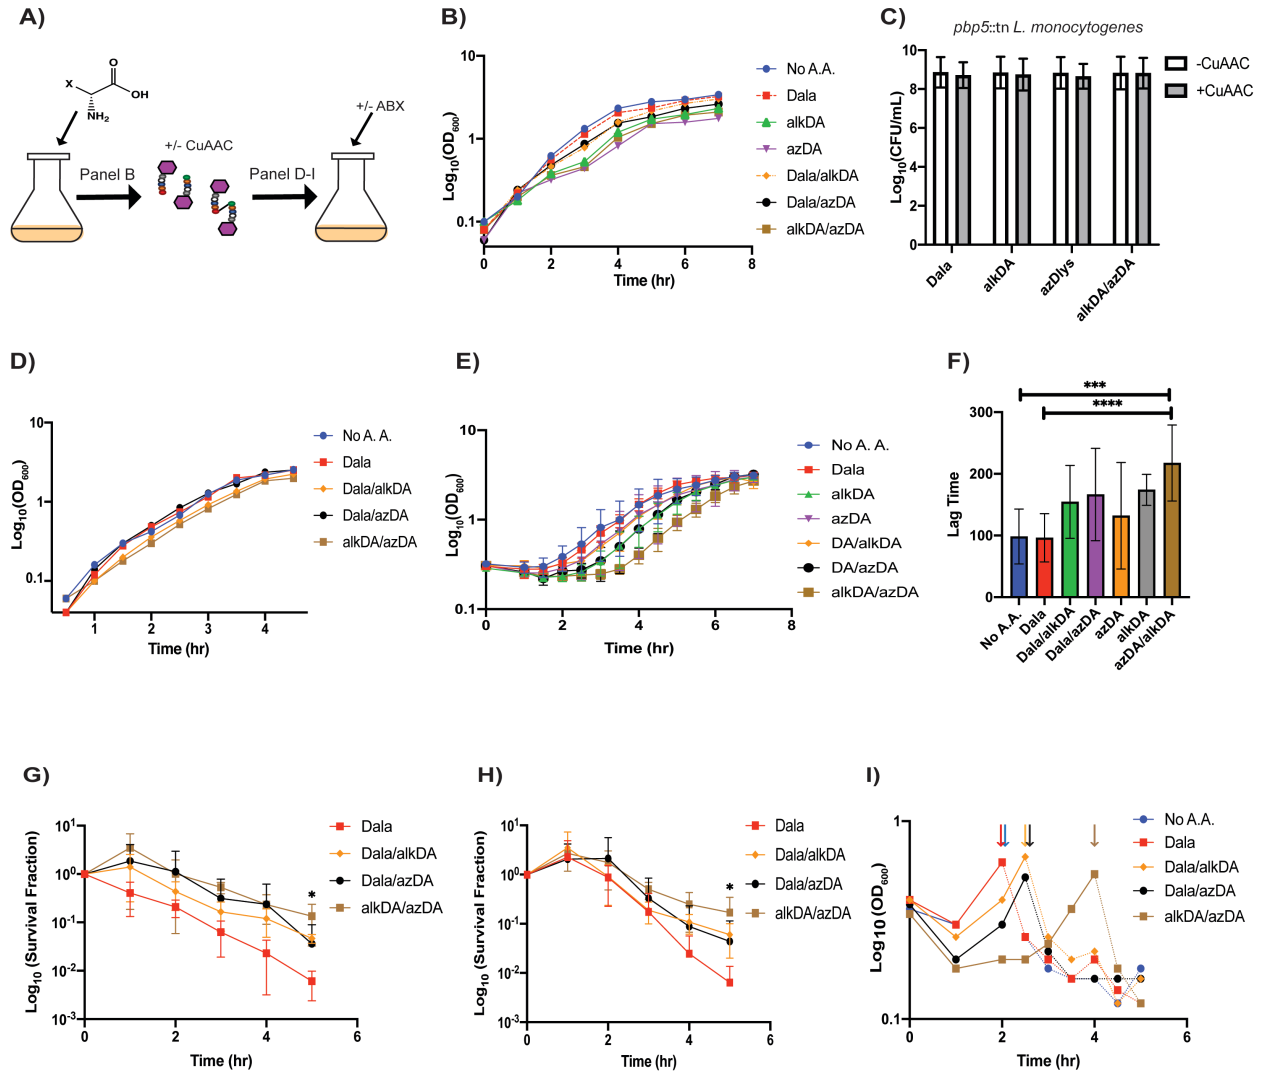

**Figure S4. Impacts of D-amino acids and/or CuAAC on bacterial growth, viability and  $\beta$ -lactam susceptibility, related to Figure 3.** (A) Experimental strategy for panels (B), (D-I), and Figure 3. ABX, antibiotics. (B) Growth of CS802-2 *E. coli* in the presence of the indicated D-amino acids pre-CuAAC. While Dala alone had no effect on growth, we observed a small but reproducible lag between 2 and 3 hours of incubation when CS802-2 *E. coli* was incubated at higher concentrations of alkDA and/or azDA. However, the growth rates stabilized and were similar between the strains after 4 to 5 hours of incubation. (C) *pbp5::tn L. monocytogenes* was incubated in the presence of the indicated D-amino acids, washed, and subjected or not to BTPP-liganded CuAAC. Serial dilutions were plated at the indicated time points and assessed the next day for colony-forming units (CFUs). (D-F) CS802-2 *E. coli* were labeled with the indicated combinations of D-amino acids overnight prior to BTPP-liganded CuAAC. Growth of D-amino acid-treated bacteria post-CuAAC (E) or mock treatment (D). (F) Quantitation of lag time from (E). (G-H) CS802-2 *E. coli* were treated with indicated combinations of D-amino acids, subjected to CuAAC, and immediately transferred to growth medium with (G) ampicillin or (H) carbenicillin. Serial dilutions were plated at the indicated time points

and assessed for colony-forming units (CFUs). The experiment in (I) was performed similarly except that ampicillin was added *after* bacteria were out of lag phase (arrow), at OD<sub>600</sub> 0.5-0.6. Growth prior to ampicillin, solid lines; lysis in the presence of ampicillin, dashed lines. Error bars, +/- standard deviation. For (B), (D) and (I) data are representative of 2-5 biological replicates. For (C), (E-H) data are average of 3-12 biological replicates performed in triplicate. Statistical significance assessed by one- (F) or two-way (G-H) ANOVA with Tukey's multiple comparison test. \*, p<0.05; \*\*\*, p<0.0005; \*\*\*\*, p<0.00005. For (G-H), only the differences between strains treated with D-alanine and the combination of alkDa/azDA were significant.
